# Supplementary material for: A top-down and bottom-up combined strategy for parameterization of coarse-grained force fields for phospholipids
Source: Royal Society of Chemistry journal article supplement (doi:10.1039/d2cp05384e), 2023-01-01
Supplement: d2cp05384e1.pdf [file d2cp05384e1.pdf]

Electronic Supplementary Material (ESI) for Physical Chemistry Chemical Physics.

---

<sup>a</sup>Institute of Theoretical and Computational Chemistry, School of Chemistry and Chemical Engineering, Nanjing University, Nanjing 210023, China

<sup>b</sup>Key Laboratory of Theoretical and Computational Photochemistry, Ministry of Education, College of Chemistry, Beijing Normal University, 19  
Xin-Jie-Kou-Wai Street, Beijing 100875, China

\*Corresponding author email address: Lianghui Gao (lhgao@bnu.edu.cn); Weihai Fang (fangwh@bnu.edu.cn)

## **Supplementary Material: A Top-down and Bottom-up Combined Strategy for Parameterization of Coarse-grained Force Fields for Phospholipids**

Mingwei Wan,<sup>ab</sup> Junjie Song,<sup>b</sup> Ying Yang,<sup>b</sup> Lianghui Gao,<sup>\*b</sup> and Weihai Fang<sup>\*ab</sup>

## SI.1. OPT1.35 FF and its predictions.

Table SI-1. Bond length and non-bonded parameters.

| Pairs                                       | $L_b$ (nm) | $\epsilon$ (kJ/mol) | $R_0$ (nm) | $\alpha$ | $\beta$ |
|---------------------------------------------|------------|---------------------|------------|----------|---------|
| <sup>a</sup> C <sub>3</sub> -C <sub>3</sub> | 0.410      | 3.091               | 0.534      | 11.442   | 11.907  |
| <sup>a</sup> C <sub>4</sub> -C <sub>4</sub> | 0.450      | 4.357               | 0.578      | 12.798   | 14.254  |
| C <sub>5</sub> -C <sub>5</sub>              | 0.490      | 4.820               | 0.613      | 14.965   | 12.754  |
| <sup>a</sup> C <sub>3</sub> -C <sub>4</sub> | 0.430      | 3.671               | 0.556      | 12.101   | 13.028  |
| C <sub>3</sub> -C <sub>5</sub>              | 0.450      | 4.582               | 0.596      | 13.839   | 13.483  |
| C <sub>4</sub> -C <sub>5</sub>              | 0.470      | 3.859               | 0.574      | 13.085   | 12.323  |
| <sup>b</sup> W <sub>d</sub> -W <sub>d</sub> | 0.5054     | 3.015               | 0.4969     | 6.249    | 9.253   |
| C <sub>3</sub> -W <sub>d</sub>              |            | 2.470               | 0.486      | 8.456    | 10.496  |
| <sup>b</sup> C <sub>4</sub> -W <sub>d</sub> |            | 2.935               | 0.492      | 8.943    | 11.484  |
| C <sub>5</sub> -W <sub>d</sub>              |            | 3.017               | 0.503      | 9.670    | 10.863  |
| COC-COC                                     | 0.364      | 4.033               | 0.512      | 11.392   | 15.557  |
| C <sub>3</sub> -COC                         | 0.387      | 3.260               | 0.524      | 11.417   | 13.610  |
| C <sub>4</sub> -COC                         | 0.407      | 3.844               | 0.546      | 12.075   | 14.891  |
| C <sub>5</sub> -COC                         | 0.427      | 4.139               | 0.558      | 13.057   | 14.086  |
| W <sub>d</sub> -COC                         |            | 4.137               | 0.492      | 8.437    | 11.998  |
| NC <sub>3</sub> -NC <sub>3</sub>            | 0.450      | 4.632               | 0.574      | 13.678   | 14.314  |
| C <sub>3</sub> -NC <sub>3</sub>             | 0.430      | 3.671               | 0.540      | 12.510   | 13.055  |
| C <sub>4</sub> -NC <sub>3</sub>             | 0.450      | 4.501               | 0.567      | 13.231   | 14.284  |
| C <sub>5</sub> -NC <sub>3</sub>             | 0.470      | 4.696               | 0.581      | 14.307   | 13.512  |
| W <sub>d</sub> -NC <sub>3</sub>             |            | 4.444               | 0.478      | 9.245    | 11.509  |
| COC-NC <sub>3</sub>                         |            | 4.508               | 0.528      | 12.483   | 14.923  |
| COOC-COOC                                   | 0.392      | 5.108               | 0.513      | 7.638    | 17.538  |
| C <sub>3</sub> -COOC                        | 0.401      | 3.334               | 0.559      | 9.348    | 14.451  |
| C <sub>4</sub> -COOC                        | 0.421      | 4.013               | 0.560      | 9.887    | 15.811  |
| C <sub>5</sub> -COOC                        | 0.441      | 4.248               | 0.562      | 10.691   | 14.956  |
| W <sub>d</sub> -COOC                        |            | 4.045               | 0.500      | 6.909    | 12.739  |
| COC-COOC                                    |            | 4.446               | 0.514      | 9.328    | 16.518  |
| NC <sub>3</sub> -COOC                       |            | 4.890               | 0.532      | 10.221   | 15.844  |
| PO <sub>4</sub> -PO <sub>4</sub>            |            | 8.318               | 0.528      | 15.665   | 16.804  |
| C <sub>3</sub> -PO <sub>4</sub>             | 0.370      | 3.995               | 0.522      | 13.388   | 14.145  |
| C <sub>4</sub> -PO <sub>4</sub>             |            | 4.533               | 0.526      | 14.159   | 15.477  |
| C <sub>5</sub> -PO <sub>4</sub>             |            | 4.721               | 0.526      | 15.311   | 14.640  |
| W <sub>d</sub> -PO <sub>4</sub>             |            | 6.197               | 0.512      | 9.894    | 12.469  |
| COC-PO <sub>4</sub>                         |            | 5.544               | 0.511      | 13.359   | 16.168  |
| NC <sub>3</sub> -PO <sub>4</sub>            |            | 6.183               | 0.488      | 14.638   | 15.509  |
| COOC-PO <sub>4</sub>                        |            | 7.012               | 0.529      | 10.938   | 17.167  |

<sup>a</sup>Parameters taken from ref. 1. <sup>b</sup>Parameters taken from ref. 2.

**Table SI-2.** Thermodynamic properties of single-component systems.

| Molecule                                     | $\rho$<br>(kg/m <sup>3</sup> ) | $\Delta H_{\text{vap}}$<br>(kJ/mol) | $\Gamma$<br>(mN/m) | $\Delta G_s$<br>(kJ/mol) |
|----------------------------------------------|--------------------------------|-------------------------------------|--------------------|--------------------------|
| W <sub>d</sub> -W <sub>d</sub>               | 999±4/997                      | 45.9±0.2/44.0                       | 69.4±2.0/72.0      | -26.4±1.0/-26.5          |
| C <sub>3</sub>                               | 494±5/493                      | 14.9±0.1/14.8                       | 6.5±0.5/6.6        | -8.6±0.1/-8.3            |
| C <sub>4</sub>                               | 573±4/573                      | 21.2±0.2/21.0                       | 12.1±0.7/11.9      | -11.8±0.1/-11.4          |
| C <sub>5</sub>                               | 597±4/621                      | 25.1±0.2/26.4                       | 15.5±0.8/15.5      | -14.2±0.1/-14.2          |
| C <sub>3</sub> -C <sub>4</sub>               | 664±4/682                      | 36.4±0.3/36.6                       | 19.5±0.9/19.8      | -20.0±0.1/-19.7          |
| C <sub>3</sub> -C <sub>5</sub>               | 662±4/699                      | 40.4±0.4/41.5                       | 22.0±0.7/21.1      | -23.0±0.1/-22.2          |
| C <sub>4</sub> -C <sub>5</sub>               | 680±4/715                      | 45.5±0.4/46.6                       | 22.4±0.8/22.4      | -25.5±0.2/-24.7          |
| COC                                          | 652±4/655                      | 18.7±0.1/18.5                       | 11.3±0.7/11.4      | -10.1±0.1/-10.2          |
| COC-C <sub>3</sub>                           | 704±3/739                      | 32.6±0.3/32.4                       | 19.3±0.9/19.5      | -17.8±0.1/-17.5          |
| COC-C <sub>4</sub>                           | 723±3/756                      | 38.0±0.3/36.9                       | 21.5±0.8/21.5      | -20.5±0.1/-20.6          |
| C <sub>5</sub> -COC-C <sub>5</sub>           | 754±3/790                      | 66.9±0.5/63.5                       | 26.9±0.9/25.4      | -36.9±0.2/-36.0          |
| NC <sub>3</sub>                              | 599±4/629                      | 22.8±0.2/24.0                       | 14.6±0.7/13.4      | -12.4±0.1/-11.7          |
| NC <sub>3</sub> -C <sub>3</sub>              | 683±3/716                      | 37.0±0.3/34.4                       | 20.0±0.8/19.2      | -20.1±0.1/-19.6          |
| NC <sub>3</sub> -C <sub>4</sub>              | 702±3/732                      | 39.2±0.3/39.1                       | 20.3±0.8/20.8      | -23.6±0.1/-23.2          |
| NC <sub>3</sub> -C <sub>5</sub>              | 713±3/744                      | 43.2±0.4/43.8*                      | 21.9±0.8/21.5      | -25.8±0.2/-25.8          |
| <sup>a</sup> COOC-C <sub>3</sub>             | 825±3/890                      | 38.2±0.4/40.2                       | 23.7±0.8/24.6      | -22.0±0.1/-21.1          |
| <sup>a</sup> COOC-C <sub>4</sub>             | 840±3/883                      | 42.4±0.4/44.1*                      | 24.1±0.9/25.7      | -24.3±0.2/-24.3          |
| <sup>a</sup> COOC-C <sub>5</sub>             | 845±3/878                      | 45.4±0.4/48.1*                      | 24.7±0.9/26.6      | -26.6±0.2/-26.7          |
| <sup>b</sup> PO <sub>4</sub> -C <sub>3</sub> | 1231±4/1202                    | 52.3±0.4/50.0                       | 32.9±0.8/37.0      | -29.0±0.2/-30.4          |

Properties (left) in green and blue mean the deviation from experiment (right and black)<sup>3-5</sup> is in the range of  $\delta < 5.0\%$  and  $\delta \geq 5.0\%$ , respectively. \*Properties experimentally unavailable are generated by extrapolating from the properties of the corresponding homologues.

<sup>a</sup>Reference properties are set as the average of the properties of COOC<sub>x</sub> and C<sub>x</sub>OOC with x equaling to 4, 5, or 6. <sup>b</sup>Experimental properties<sup>3-5</sup> of trimethyl phosphate are set as reference.

**Table SI-3.** Properties of binary mixtures.

| Cross-term                                                   | $\rho_{\text{mix}}$<br>(kg/m <sup>3</sup> ) | $E_{\text{int}}$<br>(kJ/mol) | $f_{\text{pe}}$ | $\Delta G_{\text{hyd}}$ or $\Delta G_{\text{c}}$<br>(kJ/mol) | $\Gamma_{\text{int}}$<br>(mN/m) |
|--------------------------------------------------------------|---------------------------------------------|------------------------------|-----------------|--------------------------------------------------------------|---------------------------------|
| C <sub>3</sub> -W <sub>d</sub>                               | 725±3/713                                   | -29.7±0.3/-29.6              | 1.5%            | hyd: 7.7±0.3/8.2                                             | 43.6±0.6/48.5                   |
| C <sub>4</sub> -W <sub>d</sub>                               | 752±3/738                                   | -36.6±0.3/-36.7              | 1.5%            | hyd: 8.1±0.3/8.7                                             | 47.8±0.3/49.4                   |
| C <sub>5</sub> -W <sub>d</sub>                               | 742±3/753                                   | -42.9±0.4/-43.7              | 3.6%            | hyd: 9.7±0.4/9.8                                             | 49.6±0.5/50.0                   |
| COC-C <sub>3</sub>                                           | 551±4/549                                   | -23.2±0.2/-23.1              | 0.4%            |                                                              |                                 |
| COC-C <sub>4</sub>                                           | 594±4/593                                   | -27.6±0.3/-27.1              | 2.0%            | C <sub>16</sub> : -4.4±0.2/-6.2                              |                                 |
| COC-C <sub>5</sub>                                           | 622±4/626                                   | -28.5±0.3/-29.1              | 3.9%            |                                                              |                                 |
| COC-W <sub>d</sub>                                           | 801±3/870                                   | -54.7±0.5/-57.4              | 8.8%            | hyd: -7.9±0.4/-8.0                                           |                                 |
| NC <sub>3</sub> -C <sub>3</sub>                              | 572±4/601                                   | -29.9±0.3/-32.1              | 5.3%            |                                                              |                                 |
| NC <sub>3</sub> -C <sub>4</sub>                              | 602±4/631                                   | -37.1±0.4/-37.0              | 5.8%            | C <sub>16</sub> : -9.7±0.5/-9.25                             |                                 |
| NC <sub>3</sub> -C <sub>5</sub>                              | 620±4/651                                   | -37.5±0.4/-39.8              | 3.3%            |                                                              |                                 |
| NC <sub>3</sub> -W <sub>d</sub>                              | 896±4/860                                   | -68.6±0.7/-69.8              | 8.0%            | hyd: -12.1±0.6/-13.4                                         |                                 |
| NC <sub>3</sub> -COC                                         | 658±4/691                                   | -40.9±0.4/-43.5              | 3.7%            |                                                              |                                 |
| COOC-C <sub>3</sub>                                          | 683±4/715                                   |                              | 3.5%            |                                                              |                                 |
| COOC-C <sub>4</sub>                                          | 727±3/738                                   |                              | 3.3%            | C <sub>16</sub> : -7.6±0.4/-8.3                              |                                 |
| COOC-C <sub>5</sub>                                          | 743±3/752                                   |                              | 4.4%            |                                                              |                                 |
| COOC-W <sub>d</sub>                                          | 973±5/996                                   |                              | 4.4%            | hyd: -11.9±0.5/-11.6                                         |                                 |
| COOC-COC                                                     | 844±4/847                                   |                              | 4.1%            |                                                              |                                 |
| COOC-NC <sub>3</sub>                                         | 801±3/839                                   |                              | 2.7%            |                                                              |                                 |
| <sup>a</sup> C <sub>3</sub> PO <sub>4</sub> -C <sub>3</sub>  | 794±3/807                                   |                              | 11.0%           | C <sub>6</sub> : -21.0±0.9/-24.4                             |                                 |
| <sup>a</sup> C <sub>3</sub> PO <sub>4</sub> -C <sub>4</sub>  | 812±3/825                                   |                              | 8.0%            | C <sub>7</sub> : -19.6±0.8/-23.4                             |                                 |
| <sup>a</sup> C <sub>3</sub> PO <sub>4</sub> -C <sub>5</sub>  | 804±3/832                                   |                              | 5.8%            | C <sub>8</sub> : -19.2±0.9/-22.4*                            |                                 |
| <sup>a</sup> C <sub>3</sub> PO <sub>4</sub> -W <sub>d</sub>  | 1085±5/1133                                 |                              | 3.9%            | hyd: -35.0±1.5/-36.4                                         |                                 |
| <sup>a</sup> C <sub>3</sub> PO <sub>4</sub> -COC             | 921±5/962                                   |                              | 5.1%            |                                                              |                                 |
| <sup>a</sup> C <sub>3</sub> PO <sub>4</sub> -NC <sub>3</sub> | 907±5/933                                   |                              | 5.8%            |                                                              |                                 |
| <sup>a</sup> C <sub>3</sub> PO <sub>4</sub> -COOC            | 1099±5/1132                                 |                              | 2.9%            |                                                              |                                 |

CG Properties (left) in green and blue mean the deviation from the reference data (right) is in the range of  $\delta < 5.0\%$  and  $\delta \geq 5.0\%$ . Here, the reference  $\rho_{\text{mix}}$ ,  $E_{\text{int}}$ , and  $f_{\text{pe}}$  are obtained from AA MD simulations by using the OPLS FF.<sup>6</sup> Free energy and interfacial tension are taken from experimental materials.<sup>7-8</sup> \*Properties experimentally unavailable are generated by extrapolating from the properties of the corresponding homologues. <sup>a</sup>The C<sub>3</sub>PO<sub>4</sub> group is represented by C<sub>3</sub>-PO<sub>4</sub> in CG MD simulations and trimethyl phosphate in the case of AAMD simulations and experiment.

**Table SI-4.** The bonded parameters of DMPC and DPPC lipids.

| Bond  | $L_b$<br>(nm) | $k_b$<br>(kJ/mol/nm <sup>2</sup> ) | Angle    | $\theta_a$<br>(degree) | $k_a$<br>(kJ/mol) |
|-------|---------------|------------------------------------|----------|------------------------|-------------------|
| DMPC  |               |                                    |          |                        |                   |
| 1-2   | 0.470         | 1250                               | 1-2-3    | 140                    | 7.0               |
| 2-3   | 0.390         | 1250                               | 2-3-4    | 135                    | 7.0               |
| 3-4   | 0.340         | 1250                               | 2-3-5    | 180                    | 7.0               |
| 3-5   | 0.430         | 1250                               | 3-5-6    | 180                    | 11.0              |
| 5-6   | 0.520         | 1250                               | 5-6-7    | 180                    | 11.0              |
| 6-7   | 0.470         | 1250                               | 4-8-9    | 180                    | 11.0              |
| 4-8   | 0.430         | 1250                               | 8-9-10   | 180                    | 11.0              |
| 8-9   | 0.520         | 1250                               |          |                        |                   |
| 9-10  | 0.470         | 1250                               |          |                        |                   |
| DPPC  |               |                                    |          |                        |                   |
| 1-2   | 0.470         | 1250                               | 1-2-3    | 140                    | 7.0               |
| 2-3   | 0.390         | 1250                               | 2-3-4    | 135                    | 7.0               |
| 3-4   | 0.340         | 1250                               | 2-3-5    | 180                    | 7.0               |
| 3-5   | 0.430         | 1250                               | 3-5-6    | 180                    | 11.0              |
| 5-6   | 0.520         | 1250                               | 5-6-7    | 180                    | 11.0              |
| 6-7   | 0.420         | 1250                               | 6-7-8    | 180                    | 11.0              |
| 7-8   | 0.360         | 1250                               | 4-9-10   | 180                    | 11.0              |
| 4-9   | 0.430         | 1250                               | 9-10-11  | 180                    | 11.0              |
| 9-10  | 0.520         | 1250                               | 10-11-12 | 180                    | 11.0              |
| 10-11 | 0.420         | 1250                               |          |                        |                   |
| 11-12 | 0.360         | 1250                               |          |                        |                   |

## SI.2. Meta-multilinear interpolation parameterization (meta-MIP)

The meta-MIP algorithm<sup>2</sup> was applied here to optimize parameters. It constructs local databases in an on-the-fly pattern, the connection of which leads to an optimal path, thus ensuring a high parameterization efficiency. The basic procedure is introduced as followings.

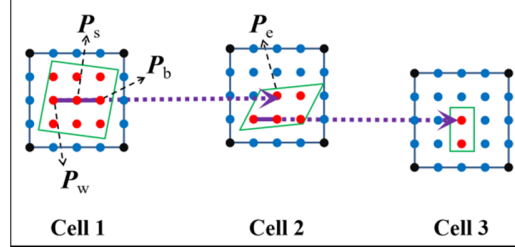

Fig. SI-1. Schematic diagram of meta-MIP.

**Step 1.** Starting from an initial parameter set  $P_s$  (Figure SI-1), Cell 1 encircling  $P_s$  is constructed.  $\{\rho, \Delta H_{vap}, \Gamma\}$  at  $2^d$  vertexes (black points) of Cell 1 are evaluated by performing simulations.

**Step 2.** The resolution inside Cell 1 is raised by multilinear interpolation via

$$f(P_x) = \sum_{n=1,2^d} \left( \left( \prod_{m=1,d} w_{n,m} \right) \times f(P_n) \right), w_{n,m} = \frac{p_{n+1,m} - p_{x,m}}{p_{n+1,m} - p_{n,m}}. \quad (SI-1)$$

Here,  $f(P)$  is the property of a  $d$ -dimensional  $P$  ( $d=2$  in Figure SI-1). The value of  $f(P_x)$  is predicted by learning from the  $2^d$  neighbors  $P_n$ . The weighting factor  $w_{n,m}$  stands for the degree of deviation of  $P_x$  from  $P_{n+1}$ .  $p_{x,m}$ ,  $p_{n,m}$ , and  $p_{n+1,m}$  is the component of  $P_x$ ,  $P_n$ , and  $P_{n+1}$  in the  $m$ th direction, respectively.

The high-resolution version of database Cell 1 is obtained (blue and red points). At each parameter point, the absolute deviations of  $\{\rho, \Delta H_{vap}, \Gamma\}$  in relative to experimental values are calculated as  $\{\delta_1, \delta_2, \delta_3\}$ .

**Step 3.** The interpolated parameter sets are screened (red points) by defining a screening condition (SC) condition. For instance,  $SC = \{\delta_1 < 200\%, \delta_2 < 200\%, \delta_3 < 200\%\}$  restricts all three properties loosely;  $SC = \{\delta_1 < 5\%, \delta_2 < 5\%, \delta_3 < 200\%\}$  reserves accuracy for  $\rho$  and  $\Delta H_{vap}$ ;  $SC = \{\delta_1 < 5\%, \delta_2 < 5\%, \delta_3 < 5\%\}$  reserves accuracy for all three properties.

**Step 4.** The screened parameter sets are ranked by defining a ranking condition (RC). For instance,  $RC = \{\text{decreasing } \delta_a = (\delta_1 + \delta_2 + \delta_3)/3\}$  outputs the parameter sets in the ascending order of  $\delta_a$ ;  $RC = \{\text{decreasing } \delta_3\}$  outputs the parameter sets in the ascending order of  $\delta_3$ ;  $RC = \{\text{increasing } \varepsilon\}$  outputs the parameter sets in the descending order of  $\varepsilon$ . Afterwards, the worst/best point  $P_w/P_b$  is obtained as the last/first ranked parameter set. Then, the optimal path in Cell 1 (purple solid line) is roughly obtained as the vector from  $P_w$  to  $P_b$ .

**Step 5.** The optimization moves to the next cell ( $P_e$ ) by extrapolating the optimal path of Cell 1 (purple dash line). This is reasonable, because the optimal path is roughly linear in local areas, and further screening and ranking could adjust the path direction. An extrapolation factor  $EF = |P_e - P_b| / |P_b - P_w|$  (suggested value of 0 to 1) is set to control the speed and stability of optimization.

**Exit condition.** If the predicted properties of  $P_b$  from interpolation are satisfying, further MD simulations are performed to test this point. If the simulated properties of  $P_b$  (or one of its neighbouring points) are satisfying, the optimization program exits.

Steps 1 to 5 are iterated until an exit criterion is met in Step 5 or an unphysical error (such as crystallization) occurs in any step. A detailed illustration for the usage of meta-MIP could be found in our previous works.<sup>2,9</sup>

### SI.3. Properties of Membranes

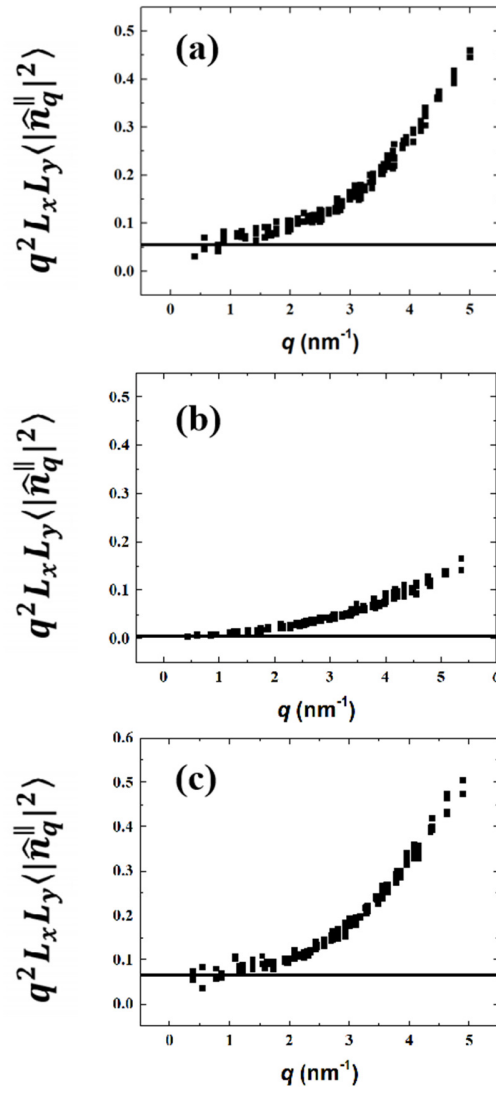

Fig. SI-2. Fluctuation spectra for (a) DMPC membrane at 303 K, (b) DPPC membrane at 303 K, and (c) DPPC membrane at 323 K.



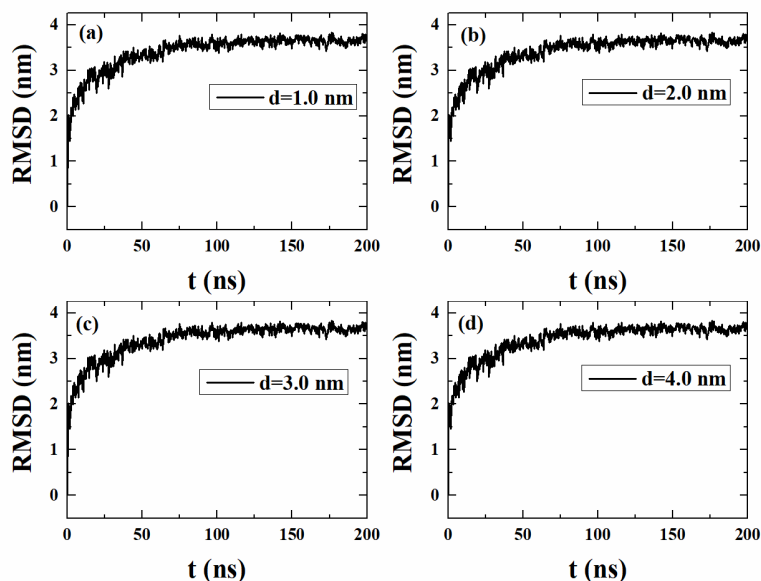

Fig. SI-3. Root mean-square deviation throughout a DMPC membrane at typical umbrella sampling windows where the normal position of a tagged lipid is constrained.

## References

1. M. Wan, J. Song, W. Li, L. Gao, W. Fang, Development of Coarse-Grained Force Field by Combining Multilinear Interpolation Technique and Simplex Algorithm. *J. Comput. Chem.* **2020**, *41*, 814-829.
2. M. Wan, J. Song, Y. Yang, L. Gao, W. Fang, Development of coarse-grained force field for alcohols: an efficient meta-multilinear interpolation parameterization algorithm. *Phys. Chem. Chem. Phys.* **2021**, *23*, 1956-1966.
3. J. Rumble, *CRC Handbook of Chemistry and Physics*. 97 ed.; CRC press: Boca Raton, 2017.
4. C. L. Yaws, *Thermophysical properties of chemicals and hydrocarbons*. 2 ed.; William Andrew: Beaumont, 2014.
5. C. L. Yaws, *The Yaws handbook of vapor pressure: Antoine coefficients*. 2 ed.; Gulf Professional Publishing: Houston, 2015.
6. M. J. Robertson, J. Tirado-Rives, W. L. Jorgensen, Improved Peptide and Protein Torsional Energetics with the OPLS-AA Force Field. *J. Chem. Theory Comput.* **2015**, *11* (7), 3499-3509.
7. S. Cabani, P. Gianni, V. Mollica, L. Lepori Group Contributions to the Thermodynamic Properties of Non-Ionic Organic Solutes in Dilute Aqueous Solution. *J. Solution Chem.* **1981**, *10* (8), 563-595.
8. S. Zeppieri, J. Rodríguez, Interfacial Tension of Alkane + Water Systems. *J. Chem. Eng. Data* **2001**, *46* (5), 1086-1088.
9. J. Song, M. Wan, Y. Yang, L. Gao, W. Fang, Development of Accurate Coarse-Grained Force Fields for Weakly Polar Groups by an Indirect Parameterization Strategy. *Phys. Chem. Chem. Phys.* **2021**, *23*, 6763-6774.
